# Supplementary material for: Entomological aspects and the role of human behaviour in malaria transmission in a highland region of the Republic of Yemen
Source: Springer Nature journal article supplement (doi:10.1186/s12936-016-1179-8), 2016-03-01
Supplement: MOESM1 [file 9762222]

Entomological aspects and the role of human behaviour in malaria transmission in a highland region of the Republic of Yemen S. M.A. Al-Eryani *et al.*

SUPPLEMENT 1 House survey and knowledge, attitudes and perception (KAP) survey

Greetings. I am doing health research in this community. I am trying to learn more about health problems here, and am very grateful to you for agreeing to talk with me. May I now ask you a few questions.

السلام عليكم ,  
أنا أقوم بعمل بحث عن الصحة. و أحاول أن أعرف ما هي مشاكلكم الصحية و أنا  
شاكر لكم موافقتكم على العمل معي. فهل بالإمكان أن أسألكم بعض الأسئلة؟

Questionnaire

Malaria survey Taiz-Yemen

استبيان

مسح مالا ريا: تعر- اليمن

District:

المدرية:

ID No:

رقم التعريف:

Village name

اسم القرية:

Date (dd/mm/yyyy)

التاريخ:

Time started:

وقت البدء:

Time ended:

وقت الانتهاء:

**Background information**

**المعلومات**

**الخاصة**

Name of respondent

الاسم:

.....

Age:

العمر:

.....

Sex: Male/Female

الجنس: ذكر\ أنثى

Marital status: married/widowed/single/divorced

الحالة الاجتماعية: متزوج\ أرمل\ عازب\ مطلق

1. How many people sleep in this house? [ ]

1- كم شخص يعيش في المنزل؟ [ ]

2- Have you ever attended school?  
Yes/No

2- هل سبق لك الذهاب إلى المدرسة؟  
نعم\لا

If YES, what was the last grade you completed? [ ]

إذا نعم، ماذا كانت آخر مرحله لك؟ ( )

(0=Not attended/Illiterate; 1=Elementary; 2=Secondary; 3=University  
4=Higher studies)

(صفر=غير متعلم 1=أساسي 2=ثانوي 3=جامعي 4=دراسات عليا)

3- Is malaria a problem for your household?

3- هل الملا ريا مشكله في عائلتك؟

(1=Yes; 2=No; 3=Don't know)

(1=نعم 2=لا 3=لا أعلم)

4- How can you get Malaria?

4- كيف يمكنك الاصابه بالمالاريا؟

5- What time of year is malaria a problem? (Wet, dry, all year, don't know)

5- أي وقت في السنة تكون الملا ريا مشكله؟ (الرطوبة، طول السنة، لا أعرف)

6- Mentioned mosquitoes [ ]

6- هل ذكر بإجابتك البعوض (الناموس) ( )

(1=Yes; 2=No; 3=No answer)

(1=نعم 2=لا 3=لم يجب)

7- How do you know someone has malaria?

7- كيف تعرف أن الشخص مصاب بالملا ريا؟

(Please tick)

(أشرف هنا)

1- Hot head

1- سخونة الرأس

2- Hot body

2- سخونة الجسم

3- Diarrhea

3- إسهال

4- Coma

4- غيبوبة

5- Dizziness

5- دووار

6- Cough/chest

6- سعال

7- Death

7- الوفاة

8- Vomiting

8- اقياء

9- Yellow eyes

9- صفار العينين

10- Constipation

10- إمساك

11- Fever

11- حمى

12- Weakness

12- ضعف

13- Lethargic

13- إجهاد

14- Muscle pain

14- ألم في العضلات

|                                 |                              |
|---------------------------------|------------------------------|
| 15-Joint pain                   | 15-الم في المفاصل            |
| 16-Headache                     | 16-صداع                      |
| 17-Sleepy                       | 17-خنعاس                     |
| 18-Can't sleep                  | 18-أرق                       |
| 19-Body pain                    | 19-الم في الجسم              |
| 20-Cold sweat                   | 20-عرق بارد                  |
| 21-Urine color<br>(yellow, red) | 21-لون البول<br>(أصفر, أحمر) |
| Don't know                      | لا أعرف                      |
| If Other, please specify        | أخرى, أذكر                   |

8-.Can you prevent yourself (or your household) from getting malaria?  
(Write Yes/No)

8-هل يمكنك حماية نفسك (أو أسرته) من الإصابة بالملا ريا؟  
(اكتب نعم/لا)

8a. If Yes, how?

8 أ- إذا نعم, كيف؟

.....

### Mosquitoes

### الناموس

9-.Where do mosquitoes come from?

9- من أين يأتي البعوض؟

.....

10-.What time of the day do they mostly bite?  
Please tick:

10 - في أي وقت باليوم يعض البعوض؟  
يرجى الإشارة:

-Day

-النهار

-Night (early or late)

-الليل (مغرب أو آخر الليل)

-All day

-طوال اليوم

-Don't know

-لا أعرف

11-What time of year do they mostly bite?  
Please tick:

11- في أي وقت بالسنة يعض البعوض؟  
يرجى الإشارة:

-Wet

-الرطوبة

-Dry

-الجفاف

-All year

-طوال السنة

-Don't know

-لا أعرف

12-.Do you know of any diseases transmitted by mosquitoes?

..... [ ]

12- هل تعرف أي مرض آخر ينتقل بواسطة البعوض؟

[ ].....

13-.Do you sit outside during the evenings?

13-هل تجلس خارج المنزل خلال الليل؟

14-.Are the mosquitoes a problem for you and your households?

Please tick:

14-هل البعوض مشكله بالنسبة لك و لعائلتك؟  
يرجى الإشارة:

Yes

نعم

No

لا

Don't know

لا أعرف

15-.Do you protect yourself from mosquitoes?

Please tick:

15. هل تحمي نفسك من البعوض؟  
يرجى الإشارة:

Yes

نعم

No

لا

Don't know

لا أعرف

15a. If YES fill in the table:

15 أ. إذا نعم, أملأ الجدول:

Ask to see net, status, if impregnated.

اطلب رؤية الناموسية وحالتها وإذا كانت معالجه

|                                                                       |  |                                                        |  |
|-----------------------------------------------------------------------|--|--------------------------------------------------------|--|
| Trap doors/ nettings for windows?<br>أبواب مشتبكة أو شبك على النوافذ؟ |  | All or Bedroom?<br>جميع الغرف أو غرفة النوم؟           |  |
| Bed net<br>ناموسية                                                    |  | Who sleeps under?<br>من ينام تحت الناموسية؟            |  |
| Coil<br>أبخرة                                                         |  | How often used and how many?<br>متى تستعمل وكم الكمية؟ |  |
| Burn herbs<br>حرق أعشاب                                               |  | How often?<br>متى تستعمل؟                              |  |
| Spray<br>بخاخ                                                         |  | How often?<br>متى تستعمل؟                              |  |
| Others<br>أخرى                                                        |  | Specify<br>حدد                                         |  |

16-If they do not use a bed net, please ask the following questions:

16. إذا كانت الناموسية لا تستعمل, اسأل الأسئلة التالية:

a. Why do you not use a bed net?

ألمماذا لا تستعمل الناموسية؟

.....

If mentioned costs in (a.) Please ask:

إذا ذكر بإجابة (أ) أن السبب هو التكلفة, اسأل:

b-Are there, apart from costs, other reasons for not using a bed net?

هل هناك سبب آخر غير التكلفة؟

.....

c. Do you know where you can obtain a bed net?

ج. هل تعرف أين يمكنك الحصول على الناموسية؟

Yes/No

نعم/لا

If Yes. Where?

إذا نعم, أين؟

.....

d. If you were given a bed net, who would sleep under it?

د. إذا أعطيت ناموسية, من سوف ينام تحتها؟

Code: Head of household 1; Wife 2; Children 3

رب المنزل 1, الزوجة 2, الأطفال 3.

.....

17-Have you, or anyone in your house, had malaria recently?

( please write Yes/ No )

17- هل أصبت أنت أو أحد من أفراد الأسرة بالملا ربا مؤخرا؟  
(أجب نعم/لا)

a. If Yes, How do you know it was malaria?

(Please tick)

symptoms tell

من الأعراض

doctors judgment

تشخيص الطبيب

other, specify

أخرى, حدد

.....

b. What did you do?

( Please tick)

ب. ماذا فعلت؟

(الرجاء الاشارة)

-To clinic

-ذهبت إلى العيادة

-Bought drugs

-Nothing

-اشتريت الدواء

other, please specify

-لا شيء

أخرى, حدد

.....

C. If visited a clinic, was a blood film made? (Yes/ No)

ج. إذا ذهبت إلى العيادة فهل أجريت فحص الدم؟ (نعم/لا)

d. If drugs were prescribed, what did you take?

(Please tick )

د. إذا كنت اشتريت دواء, ما هو؟

-Chloroquine

-كلوروكوين

-Fansidar

-فانيسيدار

-paracetamol

-باراسيتامول

Artesunate

-ارتسونيت

-Other, specify

-أخرى, حدد

e. Where did you get the drugs?

(Please tick)

ه. من أين حصلت على الدواء (ضع اشارة)

doctors prescription at clinic/pharmacy

الصيدلية أو العيادة حسب وصفة الطبيب

At pharmacy without a prescription.

الصيدلية بدون وصفة الطبيب

Other, specify

أخرى, حدد

That's all I wish to ask you. Thank you very much for your help. Is there anything you would like to ask me now?

هذا كل ما أريد أن أسألكم. شكرا لمساعدتكم. هل لديكم أسئلة تريدون طرحها؟

Name of Interviewer:

اسم الذي أجرى المقابلة:

.....

.
